# Supplementary material
Source: PubMed Central journal article supplement (PMC8050456)
Supplement: 2856_table.pdf [file 2856_table.pdf]

**On-line Table MR imaging findings in 40 patients with SAP**

| No./Sex/<br>Age(yr)  | Location       | Size<br>(mm) | Shape   | Conventional MR Imaging |               |                | ADC Value<br>(mm <sup>2</sup> /s) | TIC      |
|----------------------|----------------|--------------|---------|-------------------------|---------------|----------------|-----------------------------------|----------|
|                      |                |              |         | T1WI                    | T2WI          | Contrast       |                                   |          |
| 1/F/51 <sup>a</sup>  | L, MS+NC       | 24           | Oval    | Hypo, hetero            | Hyper, hetero | Marked, hetero | None                              | None     |
| 2/F/30 <sup>a</sup>  | R, MS+NC+CH+NP | 44           | Lobular | Hypo, hetero            | Hyper, hetero | Marked, hetero | None                              | None     |
| 3/M/59               | R, MS+NC       | 54           | Oval    | Hypo, hetero            | Hyper, hetero | Marked, hetero | None                              | Type III |
| 4/M/28               | L, MS+NC+CH+NP | 48           | Lobular | Iso, hetero             | Hyper, hetero | Marked, hetero | None                              | Type III |
| 5/M/34 <sup>a</sup>  | L, MS+NC+CH    | 45           | Lobular | Hypo, hetero            | Hyper, hetero | Marked, hetero | None                              | Type III |
| 6/F/67               | L, MS+NC       | 37           | Lobular | Hypo, hetero            | Hyper, hetero | Marked, hetero | 1.31 × 10 <sup>-3</sup>           | Type III |
| 7/M/36               | L, MS+NC       | 44           | Lobular | Hypo, hetero            | Hyper, hetero | Marked, hetero | None                              | Type III |
| 8/M/26 <sup>a</sup>  | L, MS+NC+CH    | 47           | Lobular | Hypo, hetero            | Hyper, hetero | Marked, hetero | None                              | Type II  |
| 9/F/20 <sup>a</sup>  | R, MS          | 10           | Lobular | Hypo, hetero            | Hyper, hetero | Marked, hetero | 1.80 × 10 <sup>-3</sup>           | Type II  |
| 10/F/20 <sup>a</sup> | R, MS+NC+CH+NP | 79           | Lobular | Iso, hetero             | Hyper, hetero | Marked, hetero | 1.62 × 10 <sup>-3</sup>           | Type III |
| 11/M/33              | R, MS+NC+CH    | 37           | Lobular | Iso, hetero             | Hyper, hetero | Marked, hetero | 1.27 × 10 <sup>-3</sup>           | Type III |
| 12/M/11 <sup>a</sup> | R, MS+NC+CH    | 30           | Lobular | Hypo, hetero            | Hyper, hetero | Marked, hetero | 1.10 × 10 <sup>-3</sup>           | Type III |
| 13/M/60              | L, MS+NC+CH    | 33           | Oval    | Hypo, hetero            | Hyper, hetero | Marked, hetero | 1.28 × 10 <sup>-3</sup>           | Type I   |
| 14/M/40              | R, MS+NC+CH    | 36           | Lobular | Hypo, hetero            | Hyper, hetero | Marked, hetero | None                              | Type III |
| 15/F/57              | L, MS+NC       | 46           | Oval    | Hypo, hetero            | Hyper, hetero | None           | 1.20 × 10 <sup>-3</sup>           | None     |
| 16/M/80              | R, MS+NC       | 43           | Lobular | Iso, hetero             | Hyper, hetero | Marked, hetero | 1.34 × 10 <sup>-3</sup>           | Type III |
| 17/F/36              | L, MS+NC+CH    | 32           | Lobular | Hypo, hetero            | Hyper, hetero | Marked, hetero | None                              | Type III |
| 18/F/43              | L, MS+NC+CH+NP | 36           | Lobular | Hypo, hetero            | Hyper, hetero | Marked, hetero | None                              | None     |
| 19/F/71              | R, MS          | 37           | Oval    | Hypo, hetero            | Hyper, hetero | Marked, hetero | 1.11 × 10 <sup>-3</sup>           | Type II  |
| 20/F/22              | L, MS+NC       | 44           | Lobular | Hypo, hetero            | Hyper, hetero | Marked, hetero | 1.38 × 10 <sup>-3</sup>           | Type III |
| 21/M/21              | R, MS+NC       | 30           | Oval    | Hypo, hetero            | Hyper, hetero | Marked, hetero | 1.63 × 10 <sup>-3</sup>           | Type III |
| 22/M/19              | L, MS+NC       | 36           | Lobular | Hypo, hetero            | Hyper, hetero | Marked, hetero | None                              | None     |
| 23/F/42              | L, MS+NC       | 45           | Lobular | Hypo, hetero            | Hyper, hetero | Marked, hetero | 1.34 × 10 <sup>-3</sup>           | Type III |
| 24/F/70              | R, MS+NC+CH    | 42           | Oval    | Hypo, hetero            | Hyper, hetero | Marked, hetero | None                              | None     |
| 25/F/26 <sup>a</sup> | L, MS+NC       | 44           | Oval    | Hypo, hetero            | Hyper, hetero | Marked, hetero | None                              | None     |
| 26/F/81 <sup>a</sup> | L, MS+NC+CH+NP | 31           | Lobular | Hypo, hetero            | Hyper, hetero | Marked, hetero | None                              | None     |
| 27/M/55 <sup>a</sup> | L, MS+NC+CH+NP | 76           | Oval    | Hypo, hetero            | Hyper, hetero | Marked, hetero | None                              | Type I   |
| 28/F/66              | R, MS+NC       | 35           | Oval    | Hypo, hetero            | Hyper, hetero | Marked, hetero | None                              | Type III |
| 29/M/15              | L, MS+NC       | 34           | Oval    | Hypo, hetero            | Hyper, hetero | Marked, hetero | None                              | Type III |
| 30/M/48 <sup>a</sup> | L, MS+NC+CH    | 35           | Lobular | Hypo, hetero            | Hyper, hetero | Marked, hetero | None                              | Type III |
| 31/M/40              | L, MS+NC+CH    | 33           | Lobular | Hypo, hetero            | Hyper, hetero | Marked, hetero | None                              | Type II  |
| 32/M/26              | R, MS+NC       | 42           | Lobular | Hypo, hetero            | Hyper, hetero | Marked, hetero | 1.49 × 10 <sup>-3</sup>           | Type I   |
| 33/M/29              | L, MS+NC+CH+NP | 25           | Oval    | Hypo, hetero            | Hyper, hetero | Marked, hetero | None                              | Type III |
| 34/F/13 <sup>a</sup> | L, MS+NC+CH+NP | 51           | Lobular | Hypo, hetero            | Hyper, hetero | Marked, hetero | 1.50 × 10 <sup>-3</sup>           | Type III |
| 35/M/38              | R, MS+NC       | 22           | Oval    | Hypo, hetero            | Hyper, hetero | Marked, hetero | None                              | None     |
| 36/F/28 <sup>a</sup> | L, MS+NC+CH    | 39           | Lobular | Hypo, hetero            | Hyper, hetero | Marked, hetero | 1.58 × 10 <sup>-3</sup>           | Type III |
| 37/M/79              | R, MS+NC       | 25           | Oval    | Hypo, hetero            | Hyper, hetero | Marked, hetero | None                              | None     |
| 38/F/19              | L, MS+NC       | 28           | Oval    | Iso, hetero             | Hyper, hetero | Marked, hetero | None                              | Type III |
| 39/M/25              | R, MS+NC       | 35           | Oval    | Iso, hetero             | Hyper, hetero | Marked, hetero | 1.48 × 10 <sup>-3</sup>           | Type II  |
| 40/F/53              | L, MS+NC       | 42           | Lobular | Hypo, hetero            | Hyper, hetero | Marked, hetero | 1.30 × 10 <sup>-3</sup>           | Type II  |

**Note:**—L indicates left; R, right; Iso, isointense; Hypo, hypointense; Hyper, hyperintense; MS, maxillary sinus; NC, nasal cavity; CH, choana; NP, nasopharynx; hetero, heterogeneous.  
<sup>a</sup> Indicates cases are with edematous nasal polyp.
